# Supplementary material
Source: PubMed Central journal article supplement (PMC3576573)
Supplement: NIHMS439554-supplement-supplement.pdf [file NIHMS439554-supplement-supplement.pdf]

Supplementary information for Bocker et al. "Hydroxylation of 5-methylcytosine by TET2 maintains the active state of the mammalian HOXA cluster".

Supplementary Figure S1

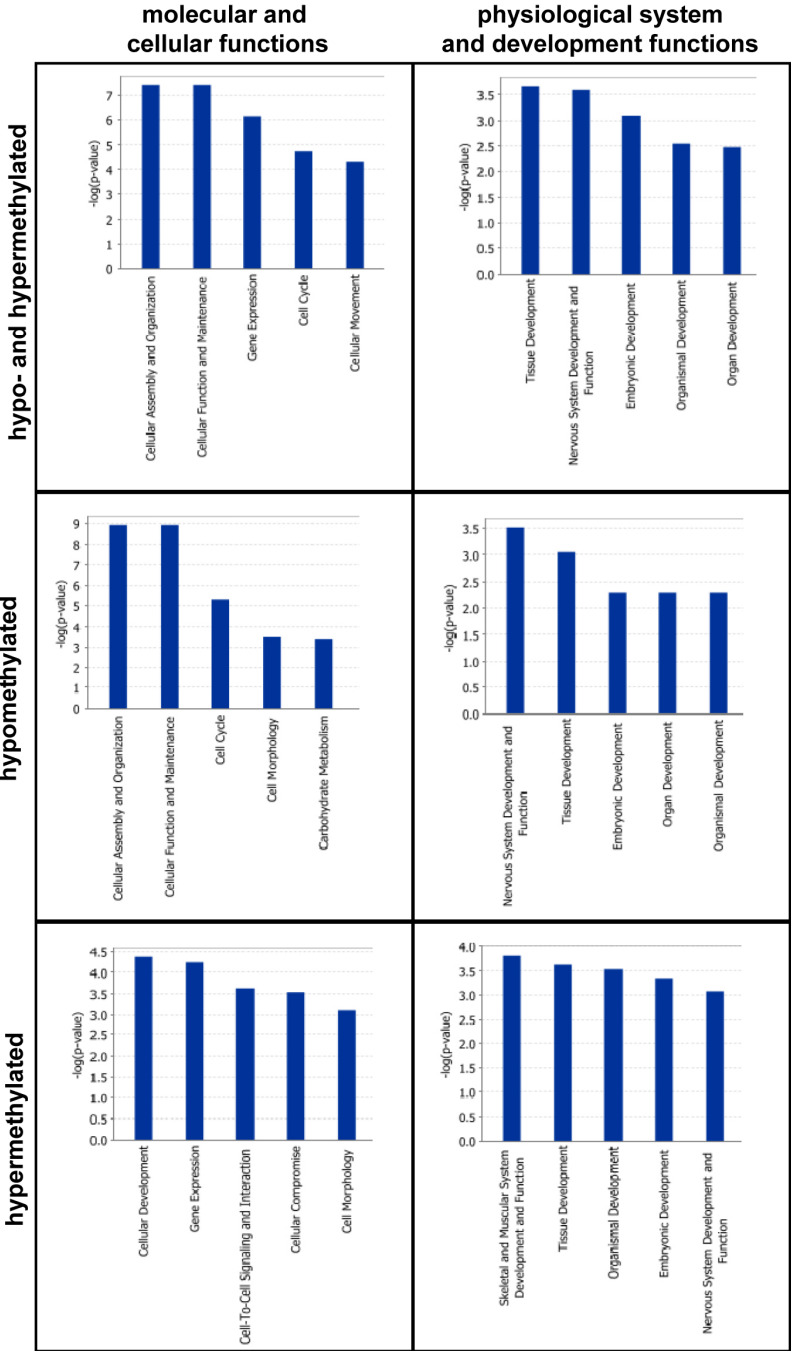

Ingenuity Pathway Analysis of differentially methylated genes of NT2 cells after 14 days of RA treatment. The bar diagrams show the five most enriched molecular and cellular functions (right) and physiological functions (left) found correlated with differentially methylated genes.

**Supplementary Figure S2**

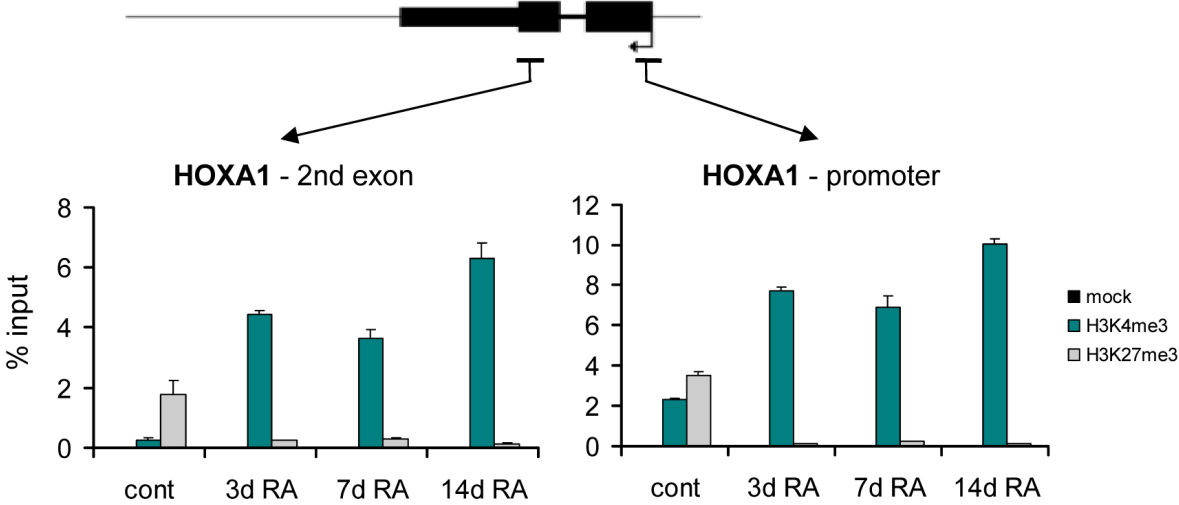

**Histone modifications in the *HOXA1* region before and after RA treatment.** Chromatin immunoprecipitation (ChIP) analysis of the *HOXA1* gene in control (cont.) NT2 cells and cells treated for 3 days, 7 days and 14 days with RA. ChIP was repeated at least three times with chromatin from biological replicates using ChIP-grade antibodies specific for H3K27me3 and H3K4me3. Immunoprecipitated DNA was analyzed by real time PCR using two primer pairs specific for the *HOXA1* promoter region and the second exon. The sketch above the diagrams shows the positions of the primers. The primer pair in the second exon covers a potential NANOG/OCT4 binding site<sup>37</sup>. Enrichments are shown as percentage of the total input. Standard deviations are indicated by error bars.

### Supplementary Figure S3

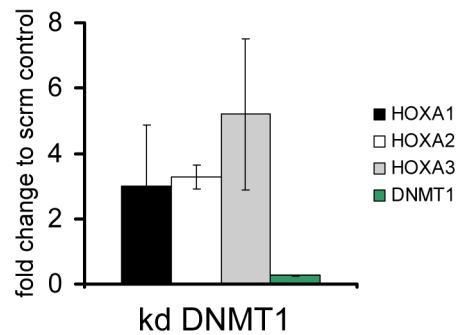

**The effect of DNMT1 depletion on *HOXA* gene expression.** Quantitative RT-PCR expression analysis of *HOXA1*, *HOXA2*, *HOXA3* and *DNMT1* after 3 days of DNMT1 knock down with a specific siRNA pool in NT2 cells. The diagrams shows fold differences compared to the scrambled control (non-targeting pool). Quantitative RT-PCR measurements are from two independent experiments and were internally normalised to the corresponding *lamin-b* and  $\beta$ -*actin* expression levels. The range is indicated by error bars.

## Supplementary Figure S4

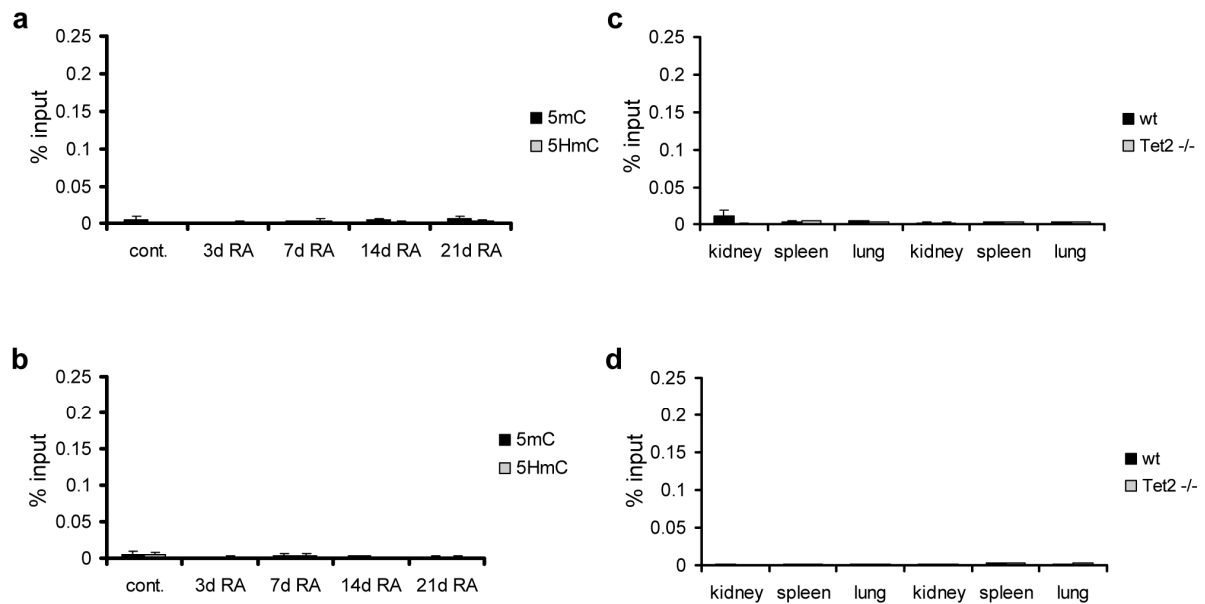

**Examples of negative control experiments for gene specific MeDIP experiments.** DNA immunoprecipitated with antibodies specific for 5mC or 5HmC using genomic DNA from NT2 cells or mouse tissues was amplified using primer pairs specific for the human unmethylated control regions<sup>52</sup> *UEB2B* (a) and *HIST1H3B* (b) or mouse unmethylated control regions *Gapdh* (c) and  *$\beta$ -actin* (d). No significant enrichments were found. Diagrams show the results of at least three independent experiments. Standard deviations are indicated by error bars.

**Supplementary Figure S5**

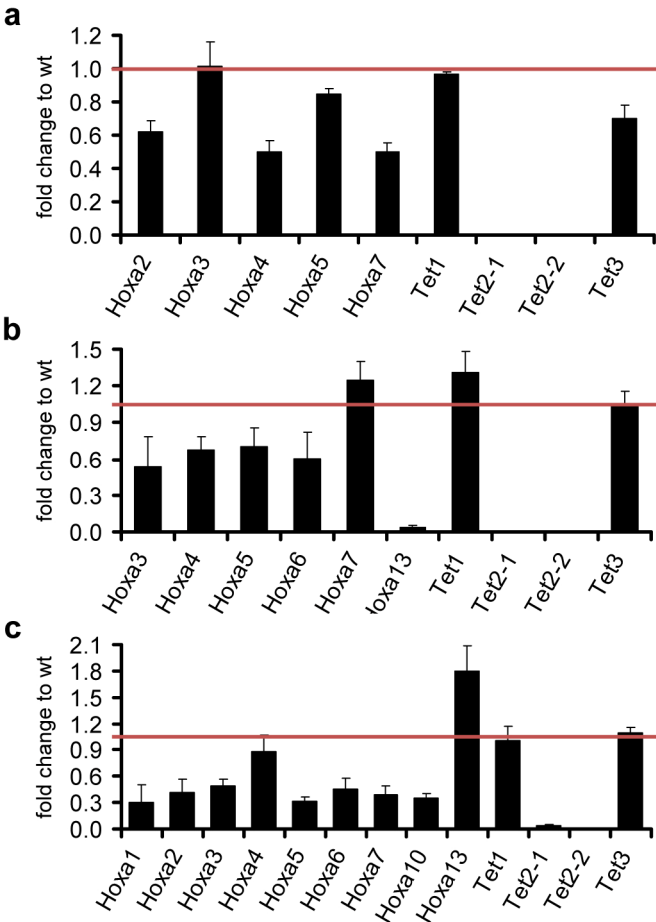

**Expression of *Hoxa* genes is reduced in mouse *Tet2*<sup>-/-</sup> tissues.** qRT-PCR expression analysis of *Hoxa* and *Tet* genes in three more tissues from the *Tet2*<sup>-/-</sup> mouse. Diagrams show the expression as fold change relative to the wild type (=1). For *Tet2*, two different primer pairs were used<sup>39</sup>. (a) spinal chord, (b) uterus and (c) ovary. Standard deviations of three replicates are indicated by error bars

## Supplementary Figure S6

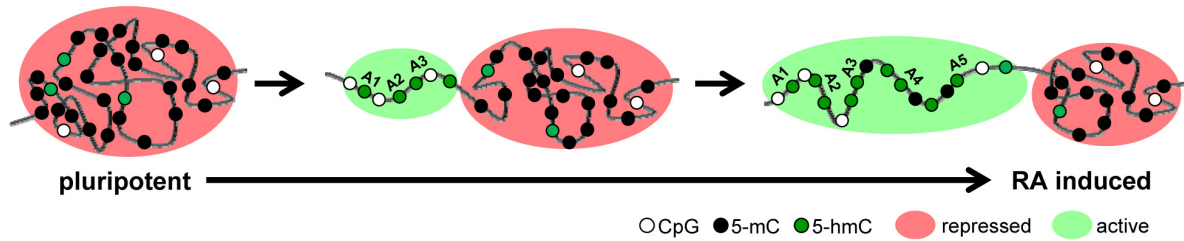

**A model describing the role of DNA methylation during the activation of the HOXA cluster.** The inactive cluster in pluripotent cells is part of an inactive higher order structure that is incompatible with transcription. The cluster is mainly marked by 5mC on the DNA level. During RA-induced differentiation HOXA genes move progressively into an active compartment, which is accompanied by 5mC-5hmC conversion.

## Supplementary Table S1. HiSeq reads.

|             | Reads #              | sample    | reads per sample     | mapped reads               |
|-------------|----------------------|-----------|----------------------|----------------------------|
| MeDIP-pool  | $92.393 \times 10^6$ | Control-1 | $45.246 \times 10^6$ | $31.513 \times 10^6$ (70%) |
|             |                      | 14d RA-1  | $47.147 \times 10^6$ | $31.690 \times 10^6$ (68%) |
| hMeDIP-pool | $38.373 \times 10^6$ | Control-2 | $10.839 \times 10^6$ | $6.461 \times 10^6$ (68%)  |
|             |                      | 14d RA-2  | $27.534 \times 10^6$ | $20.606 \times 10^6$ (75%) |

**Supplementary Table S2. RT-PCR primer pairs.**

| gene                              | forward primer                                  | reverse primer            |
|-----------------------------------|-------------------------------------------------|---------------------------|
| human HOXA1                       | GCCGTA CTCTCCA ACTTTTC                          | CTCGCCTCAATACATT CACC     |
| human HOXA2                       | TGCAGCATCTGAATTACTAAAAACA                       | CCAAATAAAAAGAAGGCAA AAC   |
| human HOXA3                       | TGCTTTGTGTTTTGTGCGAGACTC                        | CAACCCTACCCCTGCCAAC       |
| human HOXA4                       | ATGAAGAAGATCCATGTCAGC                           | CAGACAAACAGAGCGTGTGG      |
| human HOXA5                       | TGAAGTGGAACTCCTTCTCCAGC                         | CGCAAGCTGCACATAAGTCATG    |
| human HOXA6                       | TGGGCTGCGTGGAATTGATGAGC                         | GATGCAGCGCATGAACTCCTGCG   |
| human OCT4                        | CTGACAACAATGAAAATCTTCAG                         | GTTACAGAACCACACTCGGAC     |
| human $\beta$ -actin              | GATCAAGATCATTGCTCCTCCTG                         | CTAGAAGCATTTCGGGTGGAC     |
| human lamin-b                     | CTGGAAATGTTTGCATCGAAGA                          | GCCTCCCATTGGTTGATCC       |
| human DNMT1                       | Hs_DNMT1_1_SG QuantiTect Primer Assay (Qiagen)  |                           |
| human DNMT3a                      | Rn_Dnmt3a_2_SG QuantiTect Primer Assay (Qiagen) |                           |
| human DNMT3b                      | Hs_DNMT3B_1_SG QuantiTect Primer Assay (Qiagen) |                           |
| human TET1                        | TCTGTTGTTGTGCCTCTGGA                            | GCCTTTAAA ACTTTGGGCTTC    |
| human TET2                        | AAAGATGAAGGTCCTTTTTATACCC                       | TTTACCCTTCTGTCCAAACCTT    |
| human TET3                        | CCATTGCAAAGTGGGTGA                              | CGCACCAGGCAGAGTAGC        |
| mouse Hoxa1 <sup>1</sup>          | CCTTGGCAGTGGCGACTCT                             | GCGCAGGATTGAAAAGTTGT      |
| mouse Hoxa2 <sup>1</sup>          | TCGCTGAGTGCCTGACATCT                            | AAAGCGTCGAGGTCTTGATTG     |
| mouse Hoxa3 <sup>1</sup>          | CAATGGGTTGCTTACAATGC                            | AGGCAGGTCGATGGTACTCAAC    |
| mouse Hoxa4 <sup>1</sup>          | CCGGAGAATGAAGTGGAAAGAAA                         | GCCGAGGCAGTGTGGAA         |
| mouse Hoxa5 <sup>1</sup>          | TAGTTCGGTGAGCGAACAATTC                          | GCTGAGATCCATGCCATTGTAG    |
| mouse Hoxa6 <sup>1</sup>          | CCTATTTTGTGAATCCC ACTTTC                        | CAGCTGGCCCAAGAAGGA        |
| mouse Hoxa7 <sup>1</sup>          | ACGCGCTTTTTAGCAAATATACG                         | GGGTGCAAAGGAGCAAGAAG      |
| mouse Hoxa9 <sup>1</sup>          | CCGAACACCCCGACTTCA                              | TTCCACGAGGCACCAAACA       |
| mouse Hoxa10 <sup>1</sup>         | CACAGGCCACTTCGTGTTCTT                           | TTGTCCG CAGCATCGTAGAG     |
| mouse Hoxa11 <sup>1</sup>         | AGATTTCTCCAGCCTCCCTTCTT                         | TGGAGGAGTAGGAGTATGTCATTGG |
| mouse Hoxa13 <sup>1</sup>         | CCTCCCACCTCTGGAAGTC                             | TAAGGCACGCGCTTCTTTCT      |
| mouse Tet1 <sup>2</sup>           | CTGAGCCTGTTCTCGATGTGG                           | AGGTGAGAAGTAGATGAGGCTGATG |
| mouse Tet2-1 <sup>2</sup>         | GTCAACAGGACATGATCCAGGAG                         | CCTGTTCCATCAGGCTTGCT      |
| mouse Tet2-2 <sup>2</sup>         | AGCCTGATGGAACAGGACAG                            | AACGGGCTTCCATTCTGGAG      |
| mouse Tet3 <sup>2</sup>           | GGAGTTGGCTGGAGTCACCAC                           | CCACCGCATTGCCACTGTAC      |
| mouse $\beta$ -actin <sup>2</sup> | TGAACCCTAAGGCCAACCGTGA AAA                      | CAGGATGGCGTGAGGGAGAGCATAG |
| mouse GPDH                        | CATGGCCTTCCGTGTTCTTA                            | TGCTTCACCACCTTCTTGATGT    |

Primer sequences published in:

<sup>1</sup> Reference 56

<sup>2</sup> Reference 39

### Supplementary Table S3. Primer pairs for 454 bisulfite sequencing.

Each 454 primer consists of a 454 adaptor (forward GCCTCCCTCGCGCCATCAG, reverse GCCTTGCCAGCCCGCTCAG), a sample specific multiplex identifier (CACA for untreated NT2 cells and CTCT for 21d RA-induced NT2 cells as well as a gene specific sequence (see below).

| amplicon name |         | primer                         |
|---------------|---------|--------------------------------|
| hoxa1-down    | forward | TAAGAATTTAGAGGGTGAAGTTG        |
|               | reverse | TCAACTATCCAAAACCTTAAAAAAA      |
| hoxa1-1stex   | forward | TGGATTATAATTTGAGTGGGAGTAG      |
|               | reverse | AAAATACCCCATACTTAACAATAAC      |
| hoxa2-2ndex   | forward | GTTTAGGTTGGGTTTTAGGAAAG        |
|               | reverse | TTATCTCTCAATCAAATCCAACAAC      |
| hoxa3-6       | forward | ATGGGTTTTATATAGTTGTTTTTA       |
|               | reverse | ACCAATCTACTAAACCTCACTAAAC      |
| hoxa3-5-1     | forward | GGTTATTGTGGGTGAGTTGAGTAG       |
|               | reverse | ATATCAAACCCCTATCAAATATAC       |
| hoxa3-3       | forward | GTAAGAATTTGTTAGGGGAAGGG        |
|               | reverse | CTCCAAAACCAATCCTTTAAATTTA      |
| hoxa3-3-3     | forward | TTAAGAGGATAAATTAAGTTAGAATTTGAA |
|               | reverse | CAAAACAAAACAAATAAAAACCAC       |
| hoxa3-2       | forward | TTGATTAGAATTTTTTTAATAGGT       |
|               | reverse | ATACCCTAATAACTCCCTAATATTC      |
| hoxa4-2ndex   | forward | GTTTTGAGTTTGTGTTTTTTTTGGT      |
|               | reverse | AATAATATCCAATTAATCTTCCCCAC     |
| hoxa5-6-2     | forward | AGTTGAGAGGTAAGTGGAGTTTTTT      |
|               | reverse | AAAAAAAATCTAAAACTAAAACCC       |
| hoxa6-1       | forward | GGGGTTTTTTGTTTGTATTGTT         |
|               | reverse | CCTTCTTAAACCAACTACCCCTCTACC    |
| hoxa7         | forward | GGTGAGAGAAGATTTGGGTA           |
|               | reverse | CACCCCAAATTTACACCAA            |
| hoxa9         | forward | ATTATTGTTAATTTTATGTGAGGG       |
|               | reverse | AAAACTAACCCAAAATCCC            |
| hoxa10        | forward | GTAGAGGTAGTAGGAGTTTTTTTT       |
|               | reverse | CATATTTTACACAAAAATATCAACCAA    |



**Supplementary Table S4. ChIP and MeDIP qPCR-primer.**

| amplicon name          | amplicon position (hg19 Feb 2009) | forward primer<br>reverse primer                        |
|------------------------|-----------------------------------|---------------------------------------------------------|
| HOXA-down              | Chr7:27127898-27128122            | CAAGAACTCAGAGGGTGAAG<br>CGAGTCGCTCGGGCAGC               |
| HOXA1-second exon      | Chr7:27133310-27133475            | TGGGAAAGACTTAGCACAGGAAGC<br>TGGGCAAACCTCTCTAAACTGGTACAA |
| HOXA1-promoter         | Chr7:27135417-27135585            | ACTGGAAAGTTGTAATCCTATG<br>AGAAAGTTGGCACAGTCACG          |
| HOXA1-upstream_RARE    | Chr7:27136210-27136464            | CATAGAACCGTGGTGGAGG<br>CGAGCTCTGAGTTTCCAGG              |
| HOXA2-promoter         | Chr7:27142260-27142538            | TTCACTGATTACAGCCGTATG<br>CTCGCCCCACGTACTION             |
| HOXA3-2nd_CGI          | Chr7:27161528-27161808            | TTTCAAATAGGAAAAGGAAACGC<br>GTGGGCTGCTCTCTTTGTC          |
| HOXA4-second exon      | Chr7:27168958-27169218            | GGATCGCATCTTGGTGTGG<br>CTTCTATTTGGGGTTCTGG              |
| HOXA5-promoter         | Chr7:27182940-27183304            | GGAGAGTGCGTGGACGTG<br>CATCATAAATTGTGCAAGGGTG            |
| HOXA5-6                | Chr7:27184407-27184732            | AGAGGCAAGTGGAGTCTCC<br>CCAGAACAGGAAGGAAGCTC             |
| HOXA6-promoter         | Chr7:27187228-27187495            | GAGACTCGACGCCCCGTAC<br>GGTGCATTGCTGCTGTC                |
| UEB2B *                | Chr5:133706782-133706958          | CTCAGGGGTGGATTGTTGAC<br>TGTGGATTCAAAGACCACGA            |
| HIST1H3B *             | Chr6:26032431-26032716            | CTGTGCCTGGTTGCAGATTA<br>CCCACACTTCTTATGCGACA            |
| mHoxa2-promoter        | Chr6:52114601-52114889            | GCAGAAGCAATCATGTGACAGC<br>GGCTATTGATAAAACCAATCTCTCG     |
| mHoxa4-first exont     | Chr6:52141145-52141397            | GCGACCCGAGCAGTCCC<br>ACGCCGCTGCCCTCC                    |
| mHoxa5-first exon      | Chr6:52153936-52154206            | CTACAATGGCATGGATCTCAGC<br>GCTGATGTGGGTGCTGCC            |
| mHoxa7-promoter        | Chr6:52168388-52168649            | GTCTGAAGCCCAGCAAGGTAAG<br>GCAAGCCTTCCACCCTGTG           |
| mGpdh-promoter *       | Chr6:125115488-125115620          | CTCTGCTCCTCCCTGTTCC<br>TCCCTAGACCCGTACAGTGC             |
| mBeta-actin-promoter * | Chr5:143668015-143668193          | AGCCAACCTTACGCCTAGCGT<br>TCTCAAGATGGACCTAATACGGC        |

\* Primer sequences published in Reference 52.

Supplementary Reference

56. Lebert-Ghali, C.E. *et al.* HoxA cluster is haploinsufficient for activity of hematopoietic stem and progenitor cells. *Exp. Hematol.* **38**, 1074-1086 (2011).
